# Supplementary material
Source: PubMed Central journal article supplement (PMC8939307)
Supplement: NIHMS1779667-supplement-Supplemental_Table.pdf [file NIHMS1779667-supplement-Supplemental_Table.pdf]

**Supplemental Table 1.** Sample characteristics of participants included and excluded from testing on the basis of language levels, by test type

|                              | <i>Unable to receive the instrument<br/>(within valid age range)</i> |                     | <i>Received the instrument</i> |                     |
|------------------------------|----------------------------------------------------------------------|---------------------|--------------------------------|---------------------|
|                              | <i>Deletion</i>                                                      | <i>Duplication</i>  | <i>Deletion</i>                | <i>Duplication</i>  |
| <i>CASL Syntactic domain</i> |                                                                      |                     |                                |                     |
| N (%)                        | 17 (29%)                                                             | 7 (17%)             | 58 (61%)                       | 35 (83%)            |
| ASD, n (%)                   | <b>8 (47%)*</b>                                                      | 3 (42%)             | <b>8 (13%)*</b>                | 5 (14%)             |
| Age in months M(SD)          | 67.1 (28.6)                                                          | 64.6 (20.6)         | 83.5 (30.6)                    | 80.0 (30.1)         |
| Nonverbal IQ M(SD)           | 80.7 (18.0)                                                          | 60.1 (21.8)         | 86.8 (13.6)                    | 81.2 (18.7)         |
| Verbal IQ M(SD)              | 67.8 (21.1)                                                          | <b>52.8 (30.9)#</b> | 80.3 (17.1)                    | <b>88.5 (17.4)#</b> |
| Vineland-II Expressive AEs   | 35.7 (24.5)                                                          | 41.7 (32.7)         | 50.1 (25.7)                    | 70.5 (55.0)         |
| <i>CASL Pragmatic domain</i> |                                                                      |                     |                                |                     |
| N (%)                        | 15 (14%)                                                             | 8 (14%)             | 91 (86%)                       | 48 (86%)            |
| ASD, n (%)                   | 6 (40%)                                                              | <b>4 (50%)#</b>     | 20 (21%)                       | <b>8 (16%)#</b>     |
| Age in months M(SD)          | 78.8 (35.6)                                                          | 93.3 (78.2)         | 108.4 (49.5)                   | 106.2 (58.7)        |
| Nonverbal IQ M(SD)           | 79.1 (18.9)                                                          | <b>59.3 (18.9)#</b> | 88.1 (14.0)                    | <b>79.9 (19.0)#</b> |
| Verbal IQ M(SD)              | <b>65.7 (22.9)*</b>                                                  | <b>55.0 (30.0)#</b> | <b>81.4 (16.8)*</b>            | <b>86.4 (20.5)#</b> |
| Vineland-II Expressive AEs   | 46.3 (38.0)                                                          | 48.1 (36.0)         | 62.3 (42.9)                    | 75.3 (56.5)         |
| <i>CCC-2</i>                 |                                                                      |                     |                                |                     |
| N (%)                        | 11 (12%)                                                             | 1 (2%)              | 81 (88%)                       | 41 (98%)            |
| ASD, n (%)                   | 4 (36%)                                                              | 1 (100%)            | 20 (24%)                       | <b>7 (17%)#</b>     |
| Age in months M(SD)          | 83.2 (38.0)                                                          | 80.5 (-)            | 113.5 (39.6)                   | 99.1 (39.6)         |
| Nonverbal IQ M(SD)           | <b>75.9 (14.1)*</b>                                                  | 40.0 (-)            | <b>88.4 (14.4)*</b>            | 79.7 (20.2)         |
| Verbal IQ M(SD)              | 68.8 (22.4)                                                          | 30.0 (-)            | 80.5 (17.7)                    | 85.9 (20.8)         |
| Vineland-II Expressive AEs   | 39.8 (25.7)                                                          | 19.0 (-)            | 66.7 (43.5)                    | 75.9 (50.3)         |
| <i>OSEL</i>                  |                                                                      |                     |                                |                     |
| N (%)                        | 37 (46%)                                                             | 19 (41%)            | 43 (54%)                       | 27 (59%)            |
| ASD, n (%)                   | 8 (21%)                                                              | 6 (31%)             | 10 (23%)                       | 3 (11%)             |
| Age in months M(SD)          | <b>61.2 (28.2)*</b>                                                  | 67.0 (29.6)         | <b>93.4 (29.5)*</b>            | 82.5 (33.2)         |
| Nonverbal IQ M(SD)           | 83.1 (17.1)                                                          | 71.5 (22.1)         | 86.1 (12.7)                    | 81.1 (19.1)         |
| Verbal IQ M(SD)              | 74.3 (21.8)                                                          | 70.7 (32.6)         | 78.8 (15.6)                    | 87.3 (18.6)         |
| Vineland-II Expressive AEs   | <b>35.5 (22.7)*</b>                                                  | 66.0 (77.1)         | <b>54.1 (25.8)*</b>            | 61.0 (23.5)         |

*Vineland-II* Vineland Adaptive Behavioral Scale; \*Significant differences emerged between those who did not receive the instrument vs. those who did after controlling for multiple comparisons for deletion carriers. #Significant differences emerged between those who did not receive the instrument vs. those who did after controlling for multiple comparisons for duplication carriers.
